# Supplementary material
Source: PubMed Central journal article supplement (PMC6242768)
Supplement: NIHMS974905-supplement-supplement_1.pdf [file NIHMS974905-supplement-supplement_1.pdf]

## 1 **Supplementary Material**

### 2 *Tensile mechanical testing, analysis and modeling*

3 Planar biaxial mechanical testing was conducted as before for skin tissue(2). Aortic specimens  
4 were thawed at 4°C overnight prior to testing. Samples were trimmed to approximately 1 cm<sup>2</sup>  
5 and mounted in a four-motor biaxial testing apparatus (ElectroForce Systems, TA Instruments,  
6 Springfield, MO, USA) using four hooks attached to each side with 6.0 braided silk suture. Five  
7 dots were made on the luminal surface of each specimen using a surgical marker for camera  
8 tracking. Samples were hydrated for the duration of testing with 37°C 1X phosphate-buffered  
9 saline. Two 22.5 N load cells were pre-loaded to 0.01 N to remove residual slack in the sutures  
10 before testing. Motor control captured global specimen movements during testing.

11 Specimens were conditioned for 10 cycles per protocol at a rate of 0.3 mm/s at 40% global  
12 strain; data were collected at sampling frequency of 200 Hz on the 10<sup>th</sup> cycle. Five protocols with  
13 differing tension ratios per axis were run: 1:1 – equibiaxial loading of each axis to 40% strain;  
14 1:0.75 – one axis pulled to 40% strain and the other to only 75% of that; 1:0.5; 0.5:1; and 0.75:1.

15 Modeling and analysis of data were conducted as before(2), and maximum tangential stiffness  
16 (kPa), the maximum slope of the stress-strain curve, was computed along the circumferential  
17 direction, the same direction as histopathology analysis.

18

### 19 *MRI acquisitions*

20 MRI exams were conducted on MAGNETOM 1.5T Aera, Avanto or Espree (n=32) and 3T  
21 Skyra (n=15) scanners (Siemens Medical Systems, Erlangen, Germany).

22 4D flow MRI data were acquired in a sagittal volume encompassing the thoracic aorta.  
23 Respiration gating was performed using a 16 mm-acceptance window size navigator placed on  
24 the lung-liver interface. Parallel imaging (GRAPPA) along the phase encoding direction (y) was  
25 used with a reduction factor  $R=2$  (24 reference lines) to accelerate the acquisition. Other  
26 sequence parameters were as follows: repetition time =  $4.8\pm 0.1$  ms; echo time =  $2.4\pm 0.1$  ms;  
27 acquisition matrix = 160-192x80-116; isotropic pixel in-plane spacing =  $2.2\pm 0.2$  [1.7-2.9] mm;  
28 slice thickness =  $2.7\pm 0.3$  [2.2-3.5] mm; 2 k-space segments per cardiac time frame; temporal  
29 resolution =  $38.8\pm 1.2$  [36.0-41.6] ms; receiver bandwidth = 445-460 Hz/pixel. A flip angle of  $7^\circ$   
30 was used for healthy volunteers, while it was set to  $15^\circ$  in BAV patients who received injection  
31 of a gadolinium-based contrast agent (0.03 mol/kg Ablavar, Lantheus Medical Imaging, N.  
32 Billerica, MA, USA; or 0.1-0.2 mmol/kg Gadavist or Magnevist, Bayer, Leverkusen, Germany;  
33 or 0.1-0.2 mmol/kg Multihance, Bracco Diagnostics Inc., Township, NJ, USA). Finally, an  
34 encoding sensitivity  $V_{enc} = 150$  cm/s was used in controls, and  $V_{enc}$  varied from 150 to 400  
35 cm/s in BAV patients depending on the presence and severity of aortic valve stenosis.

36

### 37 *Assessment of left ventricular (LV) function and aortic dimensions*

38 LV end-systolic (ESV) and end-diastolic (EDV) volumes were measured with conventional  
39 contouring of electrocardiogram (ECG)-gated cine balanced steady state free precession short-  
40 axis images, while including the papillary muscles and chamber trabecula, using QMass v7.2  
41 (Medis, Leiden, The Netherlands). Stroke volume,  $SV = EDV - ESV$  and ejection fraction,  $EF =$   
42  $SV/EDV$  were calculated. Aortic diameter measurements were obtained from contrast-enhanced  
43 MR angiography images using the open-source, free DICOM medical image viewer Horos™  
44 (2015, <http://www.horosproject.org/>; based on OsiriX). Sinuses of Valsalva diameter was the

45 maximal value among the 3 sinus-to-sinus measurements, including the external walls. Diameter  
46 at all other locations was the maximal value over 2 orthogonal measurements in a reformatted  
47 plane orthonormal to the aorta, including the external walls(1).

48

49

#### 50 *4D flow MRI data preprocessing*

51 For each 4D flow dataset, preprocessing was first applied using a previously described Matlab  
52 program (MathWorks, Natick, MA, USA)(3), including eddy current correction, background  
53 noise suppression and velocity aliasing unwrapping. A 3D angiogram (PC-MRA) was computed  
54 by multiplying absolute velocity by magnitude images and averaging over all cardiac phases(3),  
55 to segment the aortic volume (Mimics, Materialize, Leuven, Belgium) and subsequently mask  
56 the flow velocities.

57

58 **Supplementary References**

- 59 1. Trinh B, Dubin I, Rahman O, Ferreira Botelho MP, Naro N, Carr JC, et al. Aortic  
60 Volumetry at Contrast-Enhanced Magnetic Resonance Angiography. *Invest Radiol.* 2017  
61 Apr;52(4):216–22.
- 62 2. Rosin NL, Agabalyan N, Olsen K, Martufi G, Gabriel V, Biernaskie J, et al. Collagen  
63 structural alterations contribute to stiffening of tissue after split-thickness skin grafting.  
64 *Wound Repair Regen.* 2016;24(2):263–74.
- 65 3. Schnell S, Entezari P, Mahadewia RJ, Malaisrie SC, McCarthy PM, Collins JD, et al.  
66 Improved Semiautomated 4D Flow MRI Analysis in the Aorta in Patients With  
67 Congenital Aortic Valve Anomalies Versus Tricuspid Aortic Valves. *J Comput Assist*  
68 *Tomogr.* 2016;40(1):102–8.
- 69

70 **Supplementary Tables**

71 **Table S1.** Location of resected aortic tissue samples in the 27 BAV patients, according to  
 72 longitudinal zone and circumferential quadrant. For each, n denotes the total number of samples  
 73 available over all patients.

|                                 | Longitudinal zone | AA <sub>prox</sub><br>(26 patients) | AA <sub>dist</sub><br>(5 patients) |
|---------------------------------|-------------------|-------------------------------------|------------------------------------|
| <b>Circumferential quadrant</b> |                   |                                     |                                    |
| Anterior, n                     |                   | 23                                  | 2                                  |
| Posterior, n                    |                   | 21                                  | 2                                  |
| Greater curvature, n            |                   | 25                                  | 5                                  |
| Lesser curvature, n             |                   | 12                                  | 3                                  |

AA<sub>prox</sub> and AA<sub>dist</sub>: proximal and distal ascending aorta

74
